# Supplementary material
Source: PubMed Central journal article supplement (PMC5209793)
Supplement: NIHMS808447-supplement-216_2016_9776_MOESM1_ESM.pdf [file NIHMS808447-supplement-216_2016_9776_MOESM1_ESM.pdf]

## **Analytical and Bioanalytical Chemistry**

### **Electronic Supplementary Material**

#### ***N*-linked glycosite profiling and use of Skyline as a platform for characterization and relative quantification of glycans in differentiating xylem of *Populus trichocarpa***

Philip L. Loziuk, Elizabeth S. Hecht, David C. Muddiman

MISearch.py - 216\_2016\_9776\_MOESM2\_ESM.py

MIsearchTemplate - 216\_2016\_9776\_MOESM3\_ESM.xlsx

Supplementary\_Data - 216\_2016\_9776\_MOESM4\_ESM.xlsx

## **Content**

ESM 1

Figure S1 3

Figure S2 3

Figure S3 4

Table S1 5

ESM 2 11

# ESM 1

## Supplementary Figures

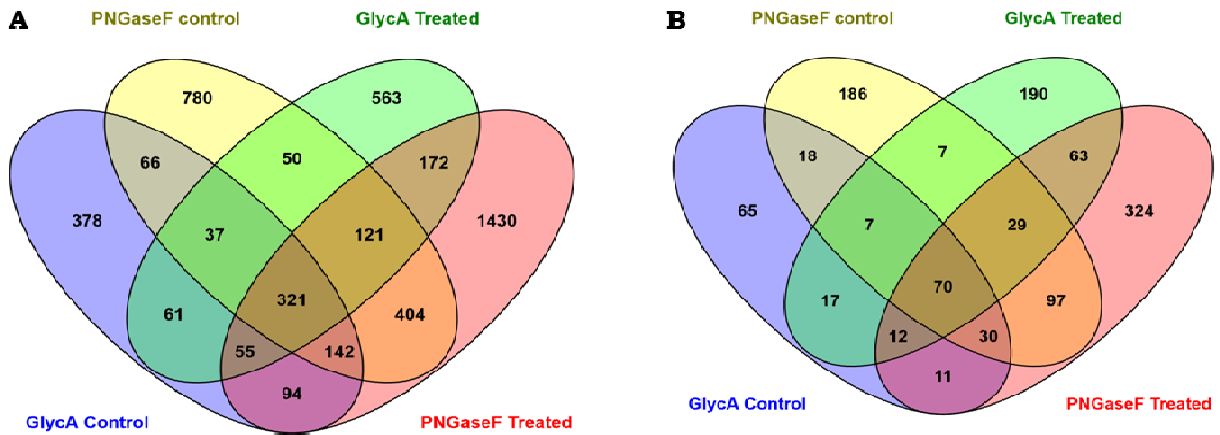

**Fig. S1** (A) Venn diagrams showing the overlap of deamidated peptides identified by control (no enzymatic treatment) samples and treated (PNGase F or Glycosidase A) samples. (B) The number of deamidated peptides in the treated is further reduced by filtering out peptides which do not contain the NXS/T glycosylation motif  
*Oliveros, J.C. (2007-2015) Venny. An interactive tool for comparing lists with Venn's diagrams. <http://bioinfogp.cnb.csic.es/tools/venny/index.html>*

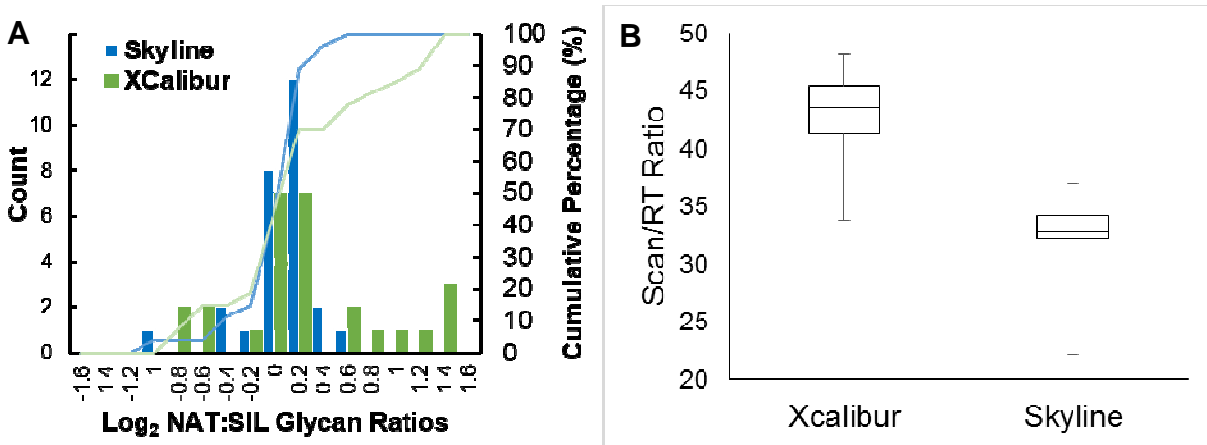

**Fig. S2** (A) The distribution of the glycan ratios calculated in Skyline or XCalibur are compared. (B) For eight glycan types with mean abundance ratios greater than 0.98, the scan/RT ratios were calculated for each method. When pooled, the mean scan/RT ratio was 42.9 and 32.9 for XCalibur and Skyline method, respectively ( $p = 5.4 \times 10^{-14}$ )

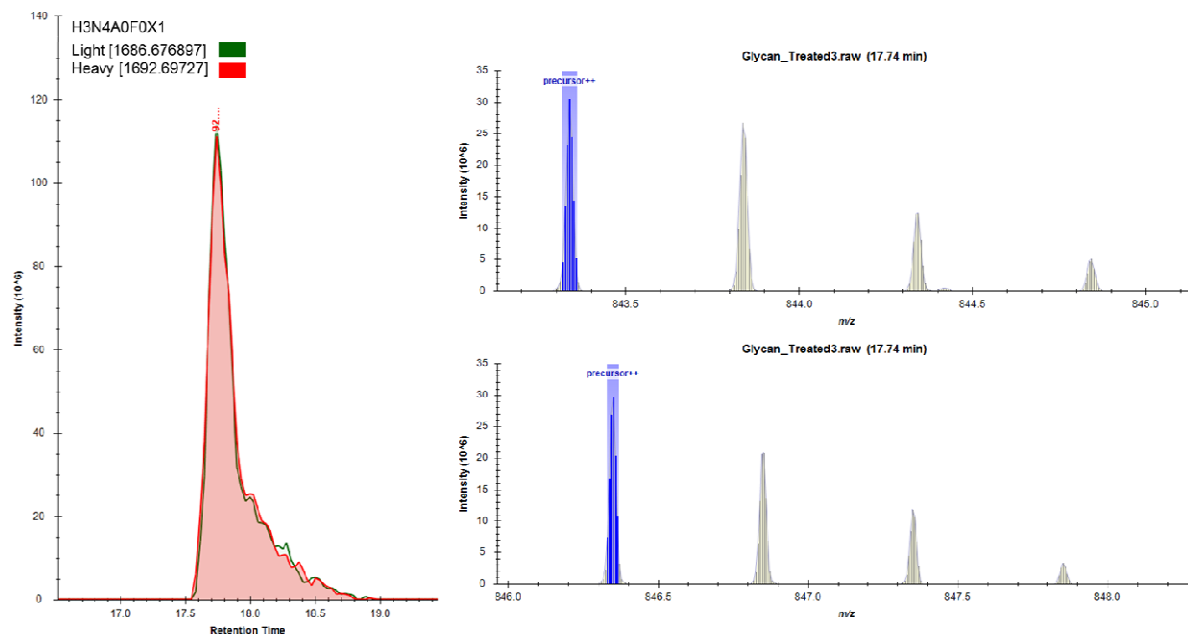

**Fig. S3** Confirmation of Glycans by Co-elution of Native/SIL Species in 1-to-1 Abundance, along with accurate mass and isotopic distribution in Skyline

## Supplementary Tables

**Table S1** For any complex-type glycan, selected diagnostic fragments are reported. In each MS/MS, the associated NAT or SIL tag was observed. For the sake of brevity, small saccharide ions in the MS/MS spectra that reveal little about complex structure were emitted, as were tables for glycans with whose structure may be completely inferred by biology (e.g. di- and tri- saccharides, *N*-glycan core structures). H<sub>10</sub>N<sub>2</sub>, H<sub>4</sub>N<sub>2</sub>F<sub>1</sub>X<sub>1</sub>, H<sub>6</sub>N<sub>5</sub>F<sub>2</sub>, and H<sub>5</sub>N<sub>4</sub>F<sub>1</sub>X<sub>1</sub> were not selected for MS/MS

| Composition of Fragment | 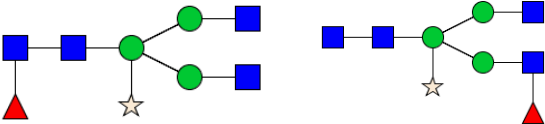 |              |                     |
|-------------------------|------------------------------------------------------------------------------------|--------------|---------------------|
|                         | Theoretical m/z (neutral)                                                          | m/z observed | Mass Accuracy (ppm) |
| N1                      | 185.07                                                                             | 186.08       | -2.134              |
| N1X1                    | 335.12                                                                             | 336.13       | -2.283              |
| H1N1                    | 365.13                                                                             | 366.14       | -2.287              |
| H1N1X1                  | 383.14                                                                             | 384.15       | 4.32                |
| H1N1X1                  | 497.17                                                                             | 498.18       | -10.03              |
| H2N1                    | 527.19                                                                             | 528.19       | 3.917               |
| H2N1X1                  | 659.23                                                                             | 660.23       | -3.36               |
| H1N2F1/H3N1             | 689.24                                                                             | 690.24       | -7.291              |
| H3N1X1                  | 821.28                                                                             | 822.28       | -14.07              |
| H2N2X1                  | 862.31                                                                             | 863.31       | -4.61               |
| H3N2X1                  | 1024.4                                                                             | 1025.4       | -0.249              |

| Composition of Fragment | 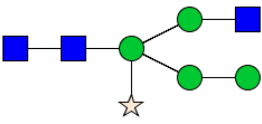 |              |                     |
|-------------------------|--------------------------------------------------------------------------------------|--------------|---------------------|
|                         | Theoretical m/z (neutral)                                                            | m/z observed | Mass Accuracy (ppm) |
| H2                      | 324.1056                                                                             | 325.1123     | -3.471              |
| H1N1                    | 365.1322                                                                             | 366.1394     | -1.712              |
| H2N1X1                  | 659.2273                                                                             | 660.2302     | -7.532              |
| H3N1                    | 689.2378                                                                             | 690.2455     | -0.123              |
| H3N1X1                  | 821.2801                                                                             | 822.2781     | -11.987             |
| H3N1X1                  | 839.2907                                                                             | 840.2988     | 0.363               |
| H4N1                    | 851.2907                                                                             | 852.2993     | 0.863               |
| H4N1X1                  | 983.3329                                                                             | 984.3406     | -0.147              |
| H4N1X1                  | 1001.3435                                                                            | 1002.3402    | -11.160             |

| H4N4F1X1                                                                           |                           |              |                     |
|------------------------------------------------------------------------------------|---------------------------|--------------|---------------------|
| Composition of Fragment                                                            | Theoretical m/z (neutral) | m/z observed | Mass Accuracy (ppm) |
| N1X1                                                                               | 335.1216                  | 336.1254     | -2.819              |
| N1F1                                                                               | 349.1373                  | 350.1476     | 7.203               |
| H1N1                                                                               | 365.1322                  | 366.1391     | -2.533              |
| H1N1                                                                               | 383.1428                  | 384.1473     | -8.574              |
| N2                                                                                 | 406.1587                  | 407.1649     | -4.099              |
| H1N1X1                                                                             | 453.1482                  | 454.1655     | 20.909              |
| H1N1X1                                                                             | 497.1745                  | 498.1803     | -4.133              |
| H1N1F1                                                                             | 511.1901                  | 512.1964     | -2.964              |
| H2N1                                                                               | 527.1850                  | 528.1921     | -1.299              |
| H2N1                                                                               | 545.1956                  | 546.2027     | -1.330              |
| H2N1X1                                                                             | 659.2273                  | 660.2341     | -1.509              |
| H3N1                                                                               | 689.2378                  | 690.2458     | 0.239               |
| H2N2                                                                               | 730.2644                  | 731.2670     | -7.114              |
| H3N1X1                                                                             | 821.2801                  | 822.2851     | -3.44               |
| H3N2                                                                               | 892.3172                  | 893.3095     | -17.455             |
| H4N2F1X1                                                                           | 1332.4702                 | 1333.4915    | 10.083              |
| H3N3X <sub>FUC</sub> X1/<br>H3X <sub>GAL</sub> N3X1/<br>H4X <sub>GLCNAC</sub> N2X1 | 1333.4655                 | 1334.4636    | -7.278              |

| Composition of Fragment                      | Theoretical m/z (neutral) | m/z observed | Mass Accuracy (ppm) |
|----------------------------------------------|---------------------------|--------------|---------------------|
|                                              |                           |              |                     |
| N1F1                                         | 349.1373                  | 350.1434     | -4.941              |
| H1N1                                         | 365.1322                  | 366.1393     | -2.123              |
| H1N1                                         | 383.1428                  | 384.1486     | -5.311              |
| H1N1F1                                       | 511.1901                  | 512.1971     | -1.536              |
| N1H2/N1 <sup>1.5</sup> X <sub>GAL</sub> F1X1 | 527.185                   | 528.1896     | -6.042              |
| H2N1                                         | 545.1956                  | 546.2030     | -0.780              |
| Tag-N2                                       | 642.2901                  | 643.2935     | -6.889              |
| H2N1X1                                       | 659.2273                  | 660.2343     | -1.251              |
| H2N1F1                                       | 673.2429                  | 674.2501     | -0.988              |
| H3N1                                         | 689.2378                  | 690.2393     | -9.177              |
| H2N1F1X1                                     | 805.2852                  | 806.2849     | -10.090             |
| H3N1X1                                       | 821.2801                  | 822.2877     | -0.323              |
| H3N1F1                                       | 835.2958                  | 836.3033     | -0.389              |
| H2N2X1                                       | 862.3067                  | 863.3024     | -14.061             |
| H3N2                                         | 892.3172                  | 893.3499     | 27.877              |
| H3N1F1X1                                     | 967.338                   | 968.3274     | -19.047             |
| H3N2X1                                       | 1024.3595                 | 1025.3641    | -3.109              |
| Tag-H2N2X1                                   | 1116.4486                 | 1117.4547    | -1.545              |
| H3N2F1X1                                     | 1170.4174                 | 1171.4301    | 4.122               |
| H4N2X1                                       | 1186.4123                 | 1187.4274    | 6.107               |
| Tag-H3N2X1                                   | 1279.5092                 | 1279.5028    | -5.025              |
| H4N2F1X1                                     | 1332.4702                 | 1333.4742    | -2.841              |
| H4N2F1X1                                     | 1350.4808                 | 1351.4796    | -6.675              |
| H3N2F1X1                                     | 1424.5593                 | 1425.5626    | -3.176              |
| H4N3F1X1                                     | 1535.5496                 | 1536.5320    | -16.571             |
| Tag-H4N3F1                                   | 1643.6336                 | 1644.6244    | -10.358             |
| Tag-H4N3F2                                   | 1789.6915                 | 1790.7008    | 0.824               |

| Composition of Fragment | Theoretical m/z (neutral) | m/z observed | Mass Accuracy (ppm) |
|-------------------------|---------------------------|--------------|---------------------|
|                         |                           |              |                     |
| N1F1                    | 349.1373                  | 350.1426     | -7.289              |
| H1N1                    | 365.1322                  | 366.1379     | -5.792              |
| H1N1                    | 383.1428                  | 384.1476     | -7.947              |
| H1N1X1                  | 497.1745                  | 498.1797     | -5.24               |
| H2N1/ XGalN1F1X1        | 527.1850                  | 528.1898     | -5.814              |
| H1N1F1X1                | 643.2324                  | 644.2386     | -2.542              |
| H2N1X1                  | 659.2273                  | 660.2332     | -2.890              |
| H2N1F1                  | 673.2429                  | 674.2438     | -10.227             |
| H1N1XGalF1X1            | 689.2378                  | 690.2402     | -7.827              |
| H2N1F1X1                | 805.2852                  | 806.2749     | -22.508             |

| Composition of Fragment     | Theoretical m/z (neutral) | m/z observed | Mass Accuracy (ppm) |
|-----------------------------|---------------------------|--------------|---------------------|
|                             |                           |              |                     |
| N2                          | 406.1587                  | 407.1650     | -3.730              |
| H2N1                        | 527.1850                  | 528.1939     | 2.058               |
| H3N1                        | 689.2378                  | 690.2440     | -2.416              |
| H3N1                        | 689.2378                  | 690.2440     | -2.416              |
| H4N1                        | 851.2907                  | 852.2996     | 1.286               |
| H4N1                        | 869.3012                  | 870.3088     | -0.213              |
| H2N4(2,5XGal)               | 1176.4181                 | 1177.4171    | -7.493              |
| H3N4(2,5XGal)               | 1338.4709                 | 1339.4541    | -18.398             |
| H3N2F1(1,4XGlcNac)(0,2XGal) | 1355.4862                 | 1356.4587    | -26.031             |
| H4N2F2(1,4XGal)(2,5XGlcNac) | 1517.5390                 | 1518.5060    | -26.915             |
| H4N4(2,5XFuc)               | 1518.5343                 | 1519.5117    | -20.023             |
| H4N4(2,5XFuc)               | 1518.5343                 | 1519.5117    | -20.023             |
| H5N2(1,3XGlcNac)(2,5XFuc)F1 | 1540.5285                 | 1541.5287    | -4.956              |
| H4N5                        | 1703.6031                 | 1704.5687    | -24.768             |
| H5N4(1,3XFuc)2              | 1794.6552                 | 1795.7025    | 22.001              |
| H3N4F1(0,4XGal)(1,5XFuc)    | 1795.6504                 | 1796.6636    | 2.977               |
| H3N5F1(0,1XGal)(3,5XFuc)    | 1795.6504                 | 1796.6637    | 3.049               |



| <b>H6N2</b>             |                           | 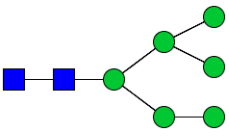 |                     |
|-------------------------|---------------------------|------------------------------------------------------------------------------------|---------------------|
| Composition of Fragment | Theoretical m/z (neutral) | m/z observed                                                                       | Mass Accuracy (ppm) |
| Tag-H1N1                | 822.3534                  | 823.3454                                                                           | -19.244             |
| H3N1                    | 689.2378                  | 690.2409                                                                           | -6.841              |
| Tag-N2                  | 660.3006                  | 661.30664                                                                          | -2.703              |
| Tag-N1                  | 457.2212                  | 458.22791                                                                          | -2.439              |
| H2N1                    | 527.1850                  | 528.1920                                                                           | -1.641              |
| Tag-H3(Xman)N2          | 1152.4485                 | 1153.4834                                                                          | 23.493              |

| <b>H7N2</b>             |                           | 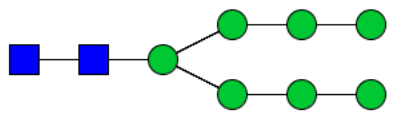 |                     |
|-------------------------|---------------------------|------------------------------------------------------------------------------------|---------------------|
| Composition of Fragment | Theoretical m/z (neutral) | m/z observed                                                                       | Mass Accuracy (ppm) |
| Tag-H2N2                | 984.4063                  | 985.40277                                                                          | -11.535             |
| Tag-H3N2                | 1146.4591                 | 1147.45386                                                                         | -11.396             |
| Tag-H1N1                | 822.3534                  | 823.35358                                                                          | -9.296              |
| H4N1                    | 851.2907                  | 852.2924                                                                           | -7.171              |
| Tag-N2                  | 660.3006                  | 661.30383                                                                          | -6.959              |
| Tag-N1                  | 457.2212                  | 458.2287                                                                           | -0.711              |
| H2N1                    | 527.1850                  | 528.1925                                                                           | -0.616              |
| H3                      | 486.1585                  | 487.1674                                                                           | 2.129               |
| H3N1                    | 689.2378                  | 690.2484                                                                           | 4.041               |

| <b>H8N2</b>             |                           | 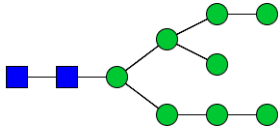 |                     |
|-------------------------|---------------------------|------------------------------------------------------------------------------------|---------------------|
| Composition of Fragment | Theoretical m/z (neutral) | m/z observed                                                                       | Mass Accuracy (ppm) |
| H3                      | 486.1585                  | 487.1662                                                                           | -0.257              |
| H2N1                    | 527.1850                  | 528.1903                                                                           | -4.884              |
| H3N1                    | 689.2378                  | 690.2449                                                                           | -1.008              |
| H4N1                    | 851.2907                  | 852.2925                                                                           | -7.031              |
| Tag-H2(Xman)N2          | 990.3957                  | 991.4317                                                                           | 28.448              |
| Tag-H3(Xman)N2          | 1152.4485                 | 1153.4694                                                                          | 11.311              |
| Tag-H4(Xman)N2          | 1314.5013                 | 1315.5206                                                                          | 8.752               |
| Tag-H4(Xman)N2          | 1378.5174                 | 1379.5309                                                                          | 4.102               |
| H7(Xman)N1              | 1379.4597                 | 1380.5153                                                                          | 34.604              |

| <b>H9N2</b>             |                           | 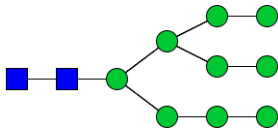 |                     |
|-------------------------|---------------------------|-------------------------------------------------------------------------------------|---------------------|
| Composition of Fragment | Theoretical m/z (neutral) | m/z observed                                                                        | Mass Accuracy (ppm) |
| H1                      | 144.0423                  | 145.0497                                                                            | -2.742              |
| H1                      | 162.0528                  | 163.0604                                                                            | -1.697              |
| N1                      | 185.0688                  | 186.0761                                                                            | -3.107              |
| N1                      | 203.0794                  | 204.0871                                                                            | -0.566              |
| N1                      | 221.0899                  | 222.0959                                                                            | -8.119              |
| H2                      | 324.1056                  | 325.1131                                                                            | -1.003              |
| H1N1                    | 365.1322                  | 366.1414                                                                            | 3.656               |
| H3                      | 486.1585                  | 487.1653                                                                            | -2.088              |
| H2N1                    | 527.185                   | 528.1924                                                                            | -0.844              |
| H2N1                    | 568.2116                  | 569.2189                                                                            | -0.871              |
| H4                      | 648.2113                  | 649.2166                                                                            | -3.880              |
| Tag-N2                  | 660.3006                  | 661.3021                                                                            | -9.579              |
| H3N1                    | 689.2378                  | 690.2432                                                                            | -3.475              |
| Tag -H1N1               | 822.3534                  | 823.3530                                                                            | -10.038             |
| H4N1                    | 851.2907                  | 852.2946                                                                            | -4.658              |
| Tag -H2N2               | 984.40635                 | 985.4129                                                                            | -1.290              |
| H5N1                    | 1013.3435                 | 1014.3428                                                                           | -8.442              |
| Tag -H3N2               | 1146.4591                 | 1147.4616                                                                           | -4.728              |
| Tag -H4N2               | 1308.512                  | 1309.5016                                                                           | -13.890             |

## ESM 2: In-house program to refine expansive glycan theoretical peak list.

The following program (MIsearch) was written to parse monoisotopic masses detected in the glycan elution window. It operates under the assumption that glycans are labeled equally with NAT and SIL co-eluting tags and therefore is present in both channels. The following supplementary material described the necessary steps to employ the workflow described in the main manuscript (Figure A).

### MI Search Template (File ESM2\_MIsearchTemplate) Preparation:

1. Generate a theoretical composition database for the targeted species.
2. Calculate multiple  $m/z$  values per composition, corresponding to multiple charge states. Note: if known, the singular dominant charge state per glycan species may be used to further reduce false positives.
3. For each glycan  $m/z$  and for each label, calculate the neutral mass range corresponding to the MMA of the data (e.g. 5 ppm). This may be calculated with the following equation:

$$\text{Lower bound} = \left( \frac{[M + H_n]^{n+}}{n} - \frac{[M + H_n]^{n+}}{n} \times MMA \right) \times n - n \times H$$
$$\text{Upper bound} = \left( \frac{[M + H_n]^{n+}}{n} + \frac{[M + H_n]^{n+}}{n} \times MMA \right) \times n - n \times H$$

4. For each theoretical composition, input the associated information. The NAT low (column E), NAT high (column F), SIL low (column J), SIL High (column K) correspond to the neutral bounds generated in step three. Likewise, the charge state ( $n$ ) should be inputted in column D and I. The ID column may be filled with any text or commentary to be associated with the glycan; it is used for reporting purposes and not for searching. The NAT and SIL theoretical columns are also used for reporting and not for searching; for convenience, the theoretical  $m/z$ , versus the neutral mass, may be inputted here so it is easily available.

### Peak Picking Method:

1. Convert MS<sup>1</sup> data to an mzXML file (msconvert, ProteoWizard).
2. Download and execute Hardklor to generate a mass list, using either the recommended parameters (methods section, main manuscript) or parameters tailored to the system. Specify the output file to .txt.
3. Open the Hardklor output .txt file in Excel and copy the neutral monoisotopic masses of the peaks and charge states (column B and C)
4. Paste Hardklor columns B and C into MI search template columns A and B. This moves the neutral monoisotopic masses into the “experimental” column and the charge states into the “charge” column.
5. Save the MI search template as desired file name.

### MI Search (File ESM2\_MISearch.py) Execution:

1. Download Python 2.7: <https://www.python.org/downloads/>
2. Set Python Path and Path variables:
  - a. Go to Control Panel > System> Advanced System Settings > Environmental Variables
  - b. Add user variable (PATH) and value (C:\python27)
  - c. Add system variable (PYTHONPATH) and value (C:\python27)
3. Download setuptools: <https://pypi.python.org/pypi/setuptools>
  - a. Unzip and then go into directory and run python setup.py install
4. Download openpyxl: <https://pypi.python.org/pypi/openpyxl>
  - a. Unzip and then go into directory and run python setup.py install
5. Open the command line and navigate to the directory where the file prepared above was stored
6. Run the program by typing: python Mlsearch.py [file.xlsx]
7. Multiple files may be run simultaneously by typing: python Mlsearch.py [file.xlsx] [file.xlsx] [file.xlsx] ...
8. Within the directory, a new file with name: file\_output.xlsx will be produced. It will output the ID, theoretical charge for the NAT and SIL species, and their associated charge states.
